# Supplementary material for: Shearing-induced formation of Au nanowires
Source: Royal Society of Chemistry journal article supplement (doi:10.1039/d4sc01749h), 2024-01-01
Supplement: d4sc01749h1.pdf [file d4sc01749h1.pdf]

## Supporting Information

### Shearing-Induced Formation of Au Nanowires

Yiwen Sun, An Su, Lecheng Zhao, Xiaobin Liu, Xueyang Liu, Yawen Wang\* and Hongyu Chen\*

#### Experimental

**Instruments:** SEM images were collected on a Gemini 450 Analytical Field Emission Scanning Electron Microscope operated at 3 kV. TEM images were collected on a Hitachi HT7800 model operated at 100 kV. High-resolution TEM images were collected on a FEI Talos F200X G2 model operated at 120 kV.

**Chemicals:** Hydrogen tetrachloroaurate(III) trihydrate ( $\text{HAuCl}_4 \cdot 3\text{H}_2\text{O}$ , 99.9%),  $\text{C}_{16}\text{TAB}$  ( $\geq 99\%$ ), L-ascorbic acid ( $\geq 99\%$ ), L-cysteine (99%, Energy), sodium borohydride ( $\text{NaBH}_4$ ,  $\geq 97\%$ ), sodium citrate ( $\text{C}_6\text{H}_5\text{O}_7\text{Na}_3$ ,  $\geq 99\%$ ), sodium hydroxide ( $\text{NaOH}$ ,  $\geq 97\%$ ), potassium iodide ( $\geq 99\%$ ), trimethylpropyl ammonium bromide ( $\text{C}_3\text{TAB}$ ,  $\geq 98\%$ ), hexyltrimethylammonium Bromide ( $\text{C}_6\text{TAB}$ ,  $\geq 98\%$ ), octadecyl-trimethylammonium bromide ( $\text{C}_{18}\text{TAB}$ ,  $\geq 98\%$ ) hexadecyl-trimethylammonium chloride ( $\geq 98\%$ ), benzyldimethyl-hexadecylammonium chloride ( $\geq 98\%$ ) were purchased from Sigma-Aldrich. Dodecyl-trimethylammonium bromide ( $\text{C}_{12}\text{TAB}$ ,  $\geq 98\%$ ) was purchased from Aladdin. Tetradecyl-trimethylammonium bromide ( $\text{C}_{14}\text{TAB}$ ,  $\geq 98\%$ ) was purchased from TCI Chemicals (Japan). D-glutathione ( $\geq 98\%$ ) was purchased from GL Biochem., Ltd. (Shanghai, China). Milli-Q water (resistivity  $18.2 \text{ M}\Omega \cdot \text{cm}$  at  $25^\circ\text{C}$ ) was used in all experiments.

Triangular Au nanoplates with an edge length of  $150 \text{ nm}^1$  and Au decahedra<sup>2</sup> were synthesized following literature. The as-synthesized seeds were washed 2 times with water

and re-dispersed as aqueous solution with no concentration variation before added in the nanowire syntheses.

**Shear-induced synthesis of Au nanowires (for nano-bowls):** The whole process was performed at 60 °C. CTAB (50 mM, 1 mL) and H<sub>2</sub>O (4 mL) were placed into a 15 ml vial and heated to 60 °C, followed by addition of HAuCl<sub>4</sub> (20 mM, 37.5 µL), L-ascorbic acid (100 mM, 16.5 µL) and L-cysteine (0.01 mM, 40 µL) quickly. Next, 40 µL triangular Au nanoplates solution was quickly added under vigorous vortexing. The mixture was shaken at 60 °C for 30 min in a 300 rpm orbital shaker. The product was purified with centrifugation and subjected to characterizations.

**Shear-induced synthesis of Au nanowires (for nano-badges):** The whole process was performed at room temperature. CTAB (100 mM, 0.8 mL), HAuCl<sub>4</sub> (10 mM, 0.2 mL) and H<sub>2</sub>O (3.95 mL) were placed into a 15 ml vial. Then 100 mM, 0.475 mL AA were added to the above solution quickly. Then 40 µL fresh prepared D-glutathione solution (0.15 mg/mL) and 100 µL triangular Au nanoplates were added to the above solution. The mixture was shaken at 30 °C for 60 min in a 300 rpm orbital shaker. The product was purified with centrifugation and subjected to characterizations.

**Shear-induced synthesis of Au nanowires (for nano-propellers):** The whole process was performed at room temperature. CTAB (100 mM, 0.8 mL), HAuCl<sub>4</sub> (10 mM, 0.2 mL) and H<sub>2</sub>O (3.95 mL) were placed into a 15 ml vial. Then 100 mM, 0.475 mL AA were added to the above solution quickly. Then 40 µL fresh prepared D-glutathione solution (0.15 mg/mL) and 1 µL Au decahedra were added to the above solution. The mixture was shaken at 30 °C for

60 min in a 300 rpm orbital shaker. The product was purified with centrifugation and subjected to characterizations.

## Supplementary Figures

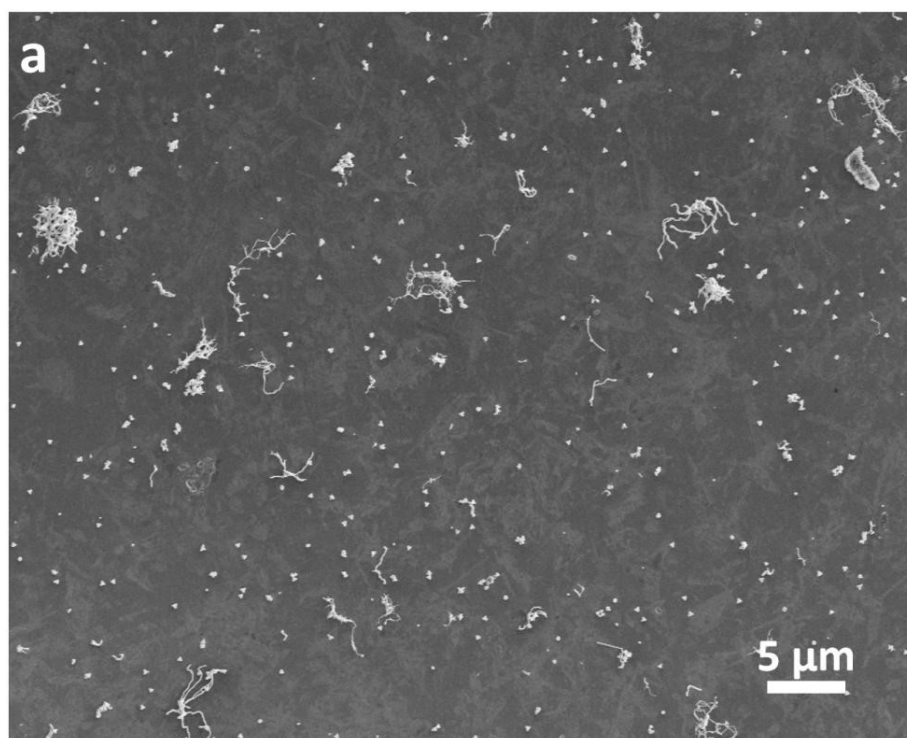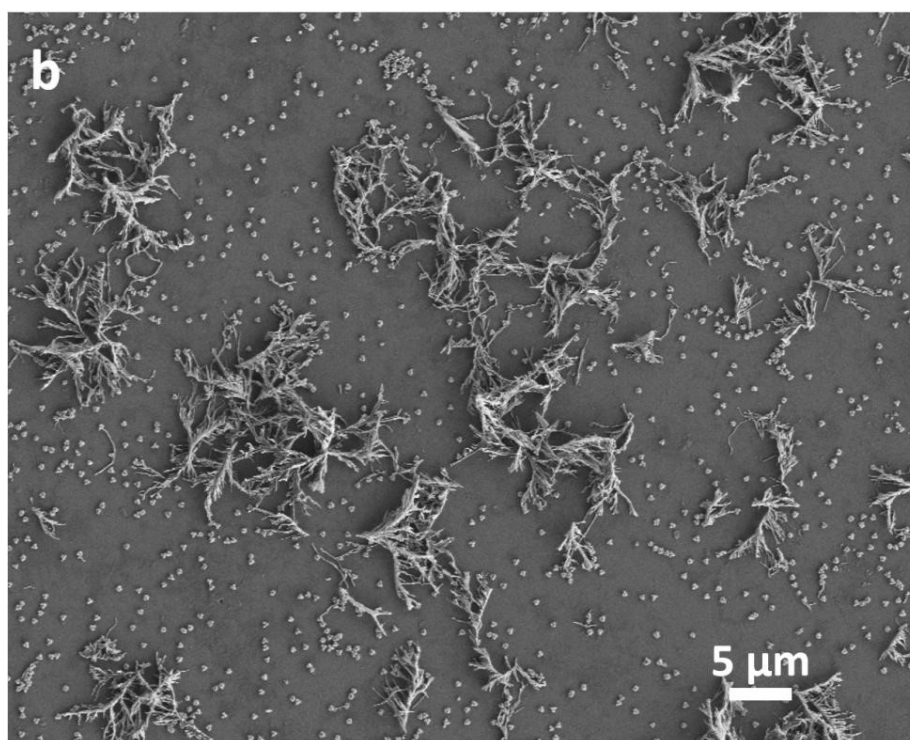

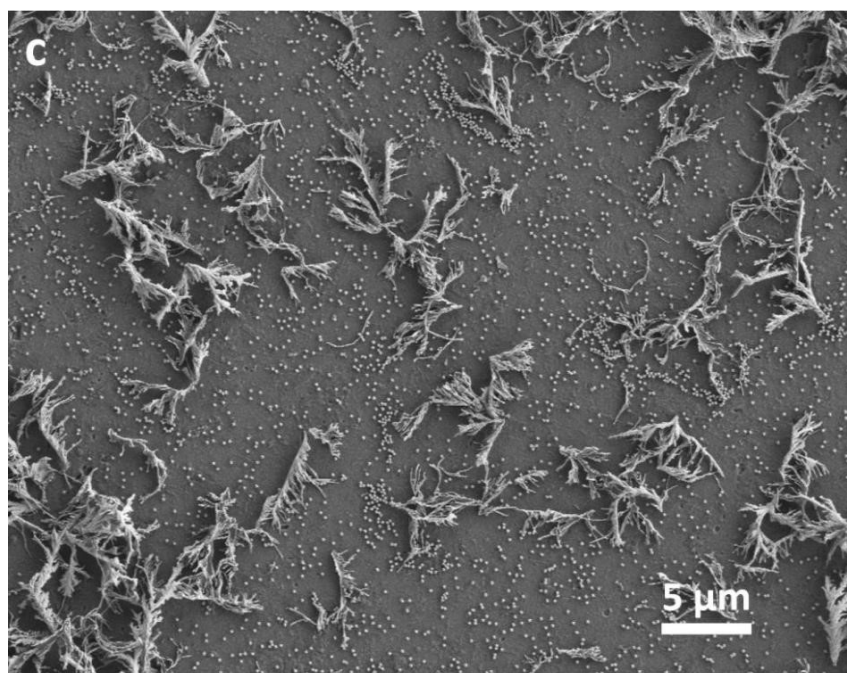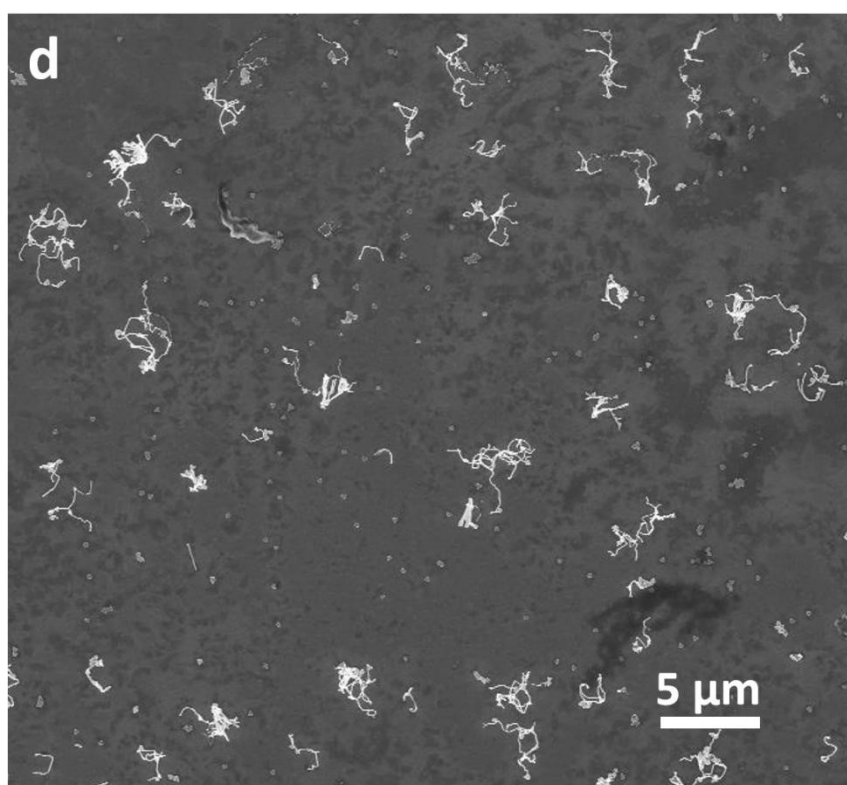

**Fig. S1** SEM images of the Au nanowires when shear-force was applied during the synthesis of: (a) nano-bowls, (b) nano-badges, (c) nano-propellers, and (d) in the absence of any thiol-based ligands.

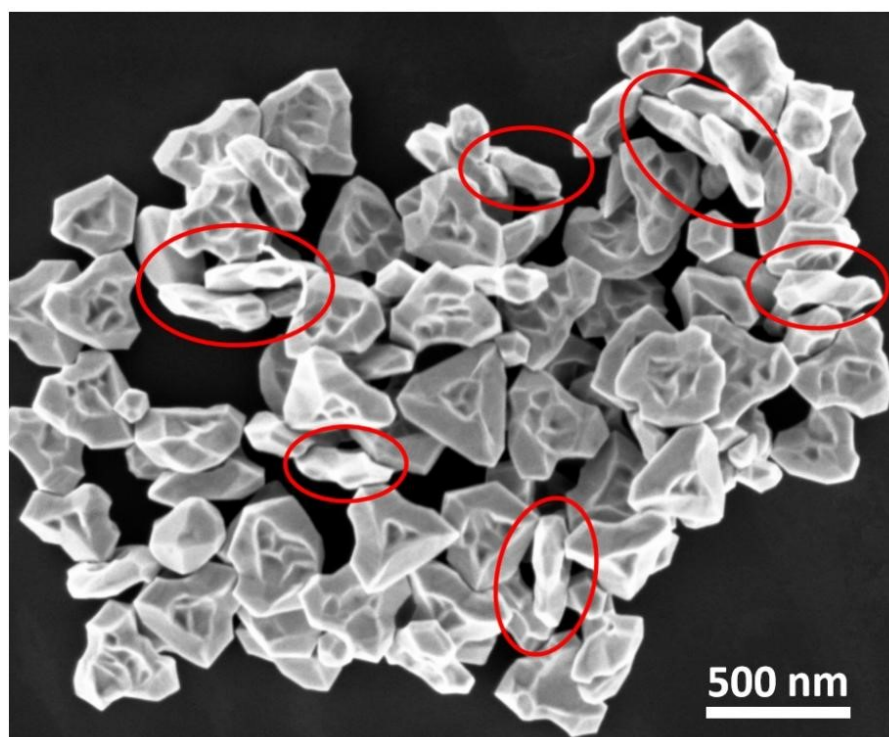

**Fig. S2** SEM image of the tilted hexagonal particles after shaking the growth solution for 30 min.

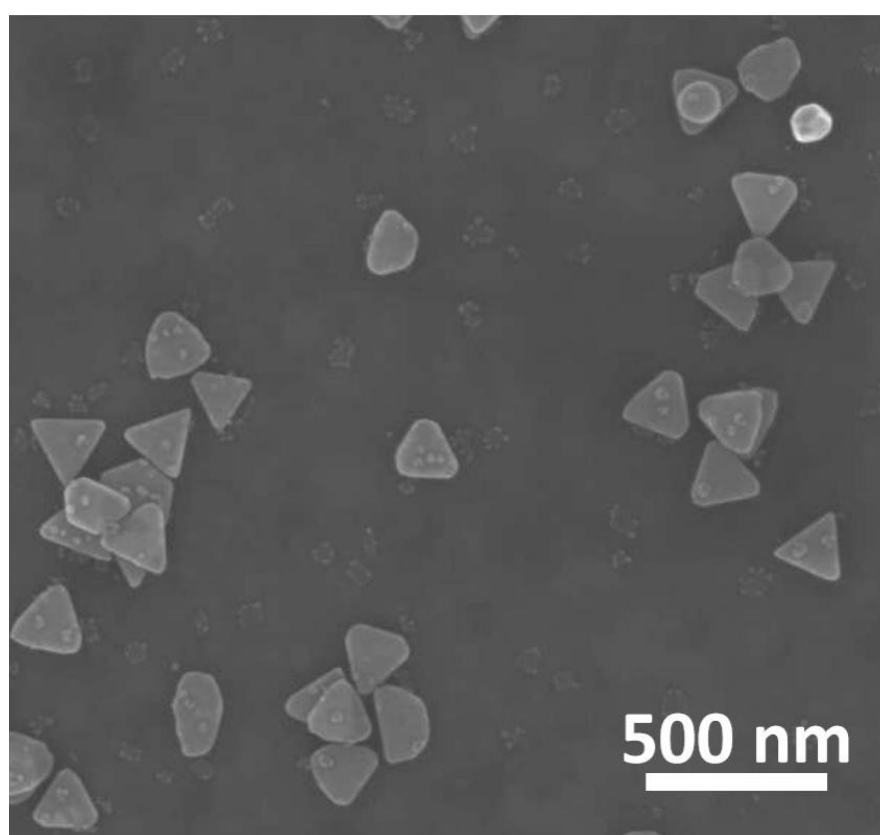

**Fig. S3** SEM image of the triangular Au nanoplate seeds.

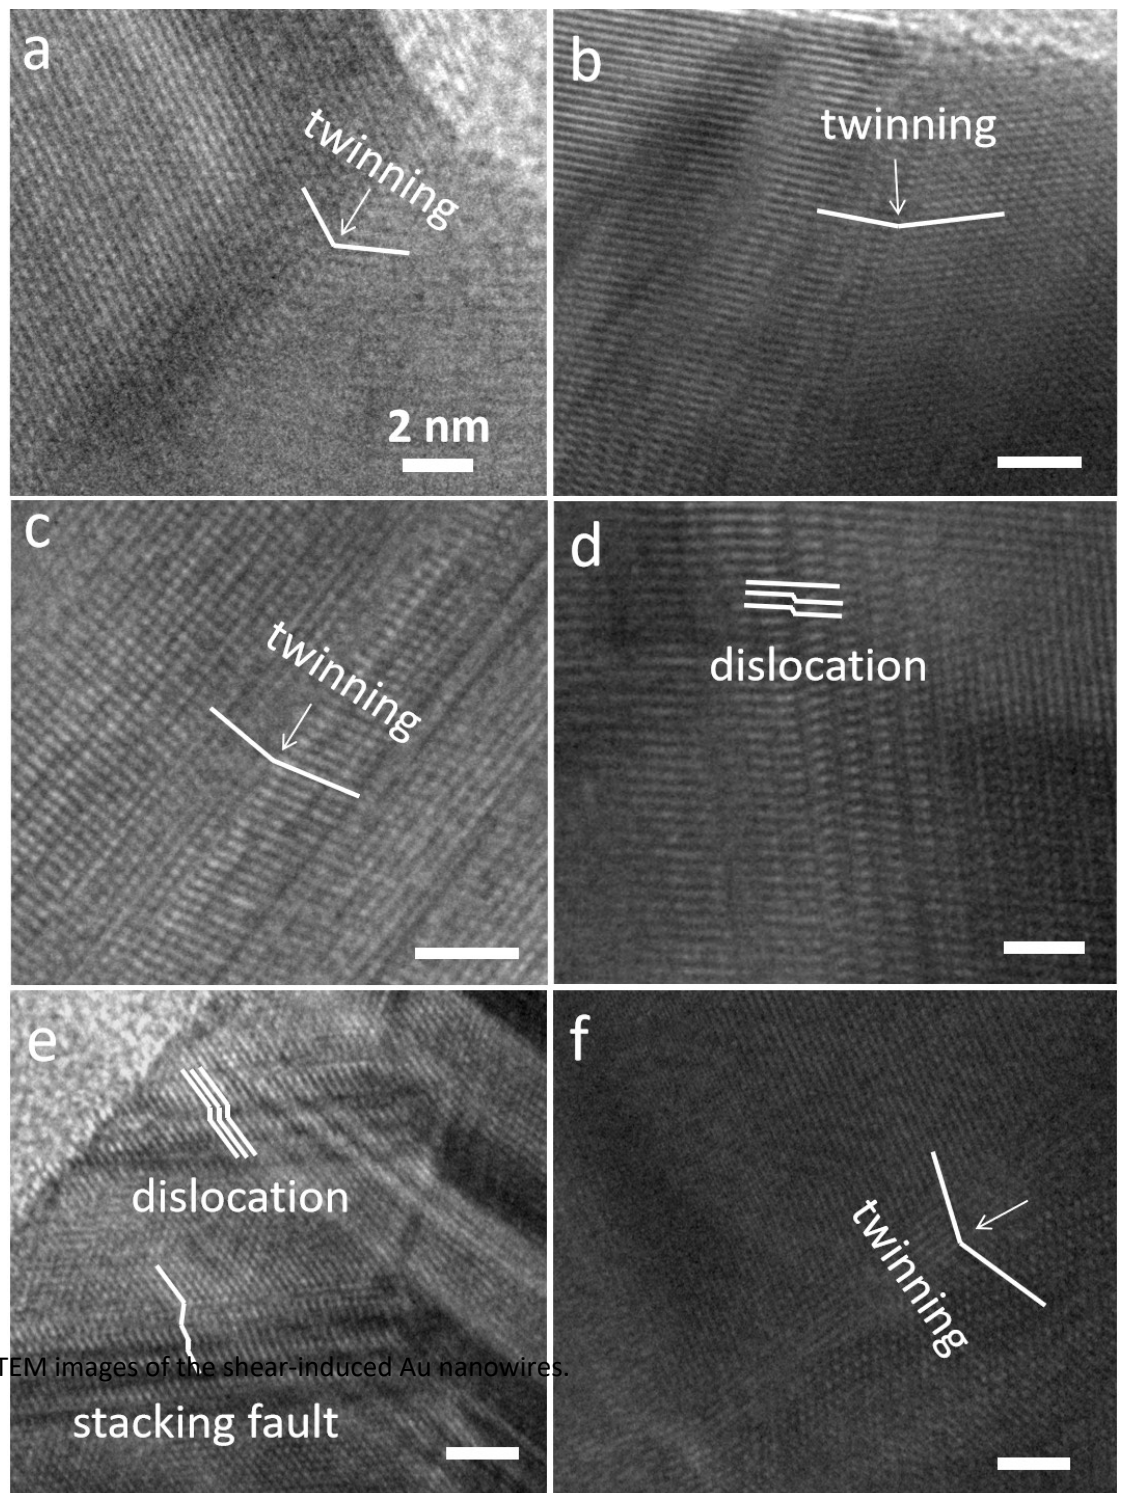

**Fig. S4** (a-f) HRTEM images of the shear-induced Au nanowires.



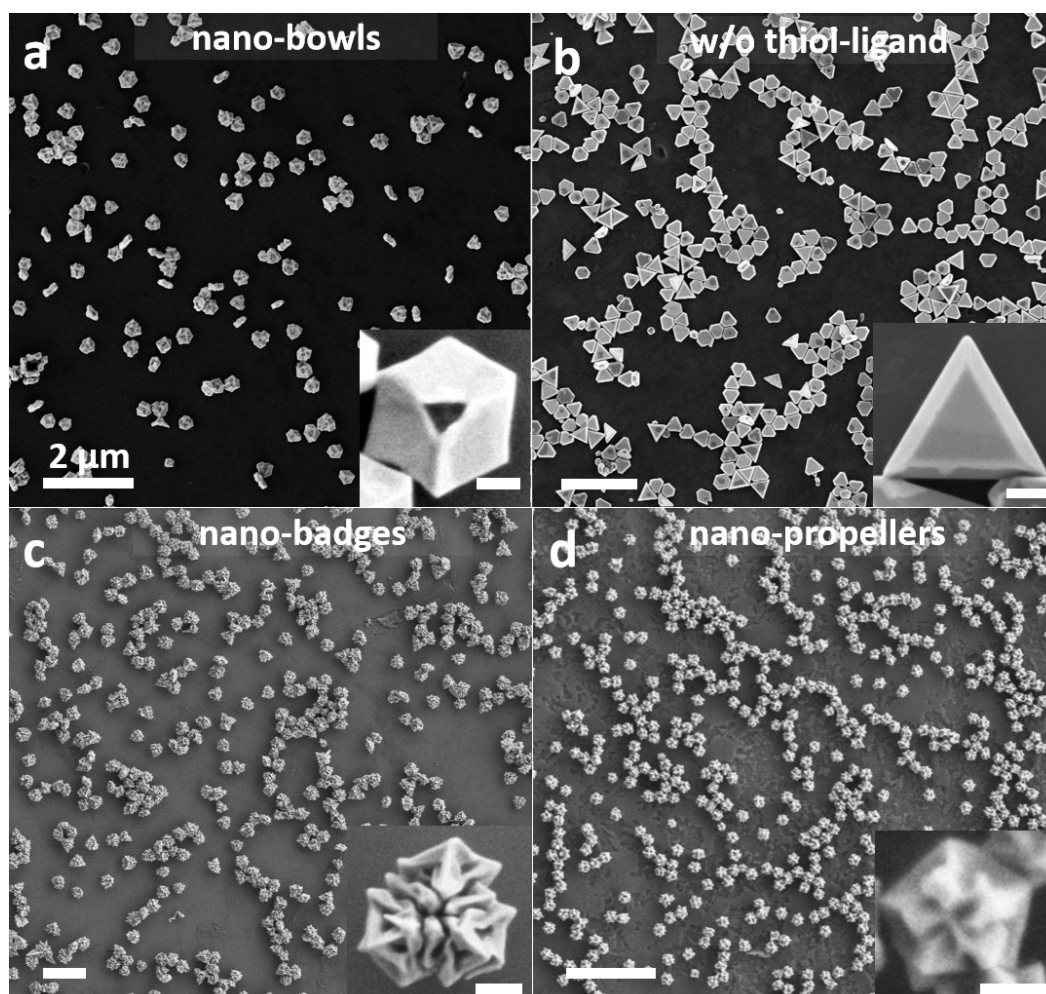

**Fig. S5** SEM images of the (a) nano-bowls, (b) enlarged triangular nanoplates (with all condition the same as (a) except no thiol-ligands), (c) nano-badges and (d) nano-propellers synthesized in static solutions. (All the inset scale bars are 100 nm)



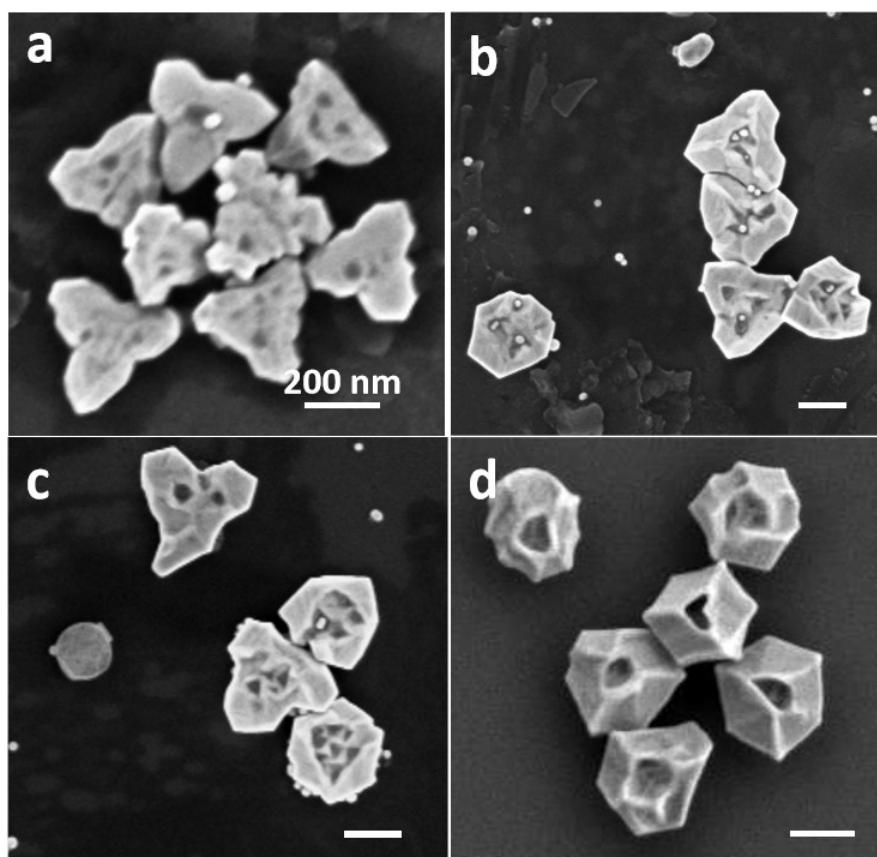

**Fig. S6** SEM images of nanostructures/nano-bowls obtained at (a) 1 min, (b) 5 min, (c) 10 min, and (d) 30 min reaction time in static solutions.

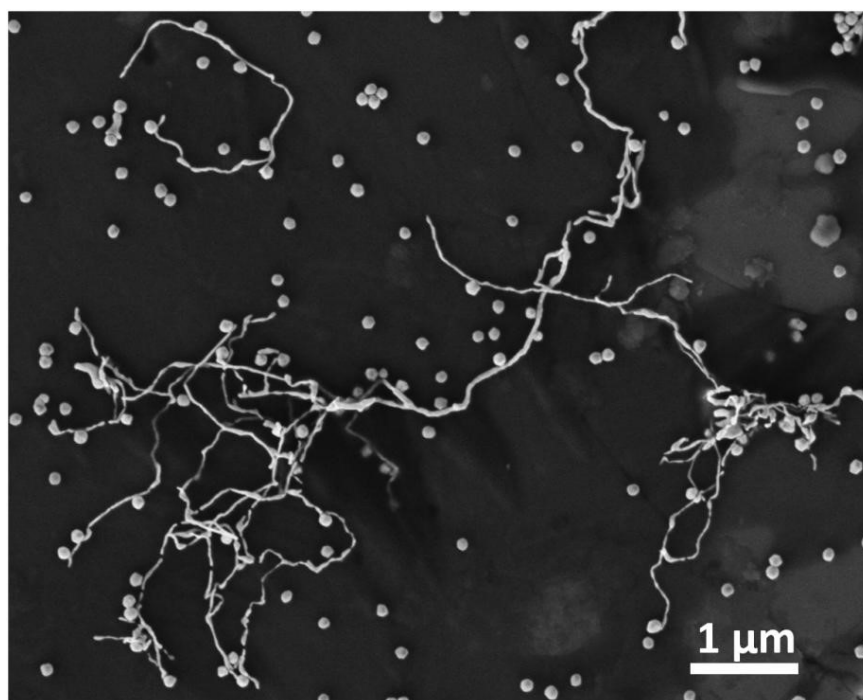

**Fig. S7** SEM image of the shear-induced Au nanowires with the 60 nm Au nanoparticles as the seeds.

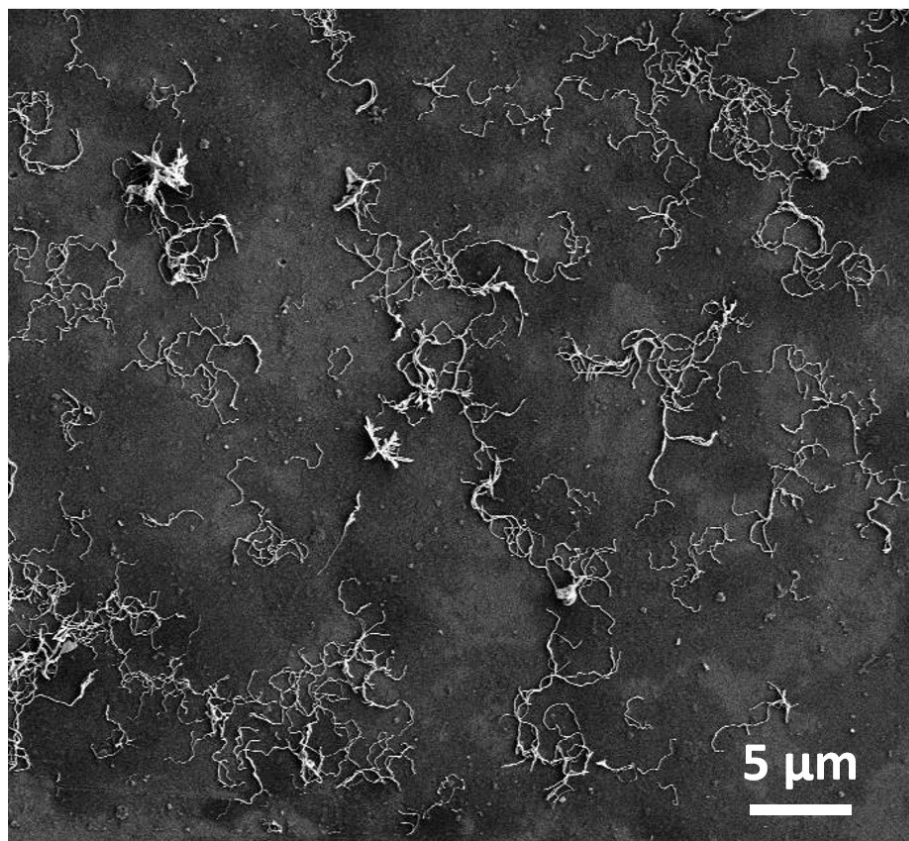

**Fig. S8** SEM image of the shear-induced Au nanowires obtained without any seeds.

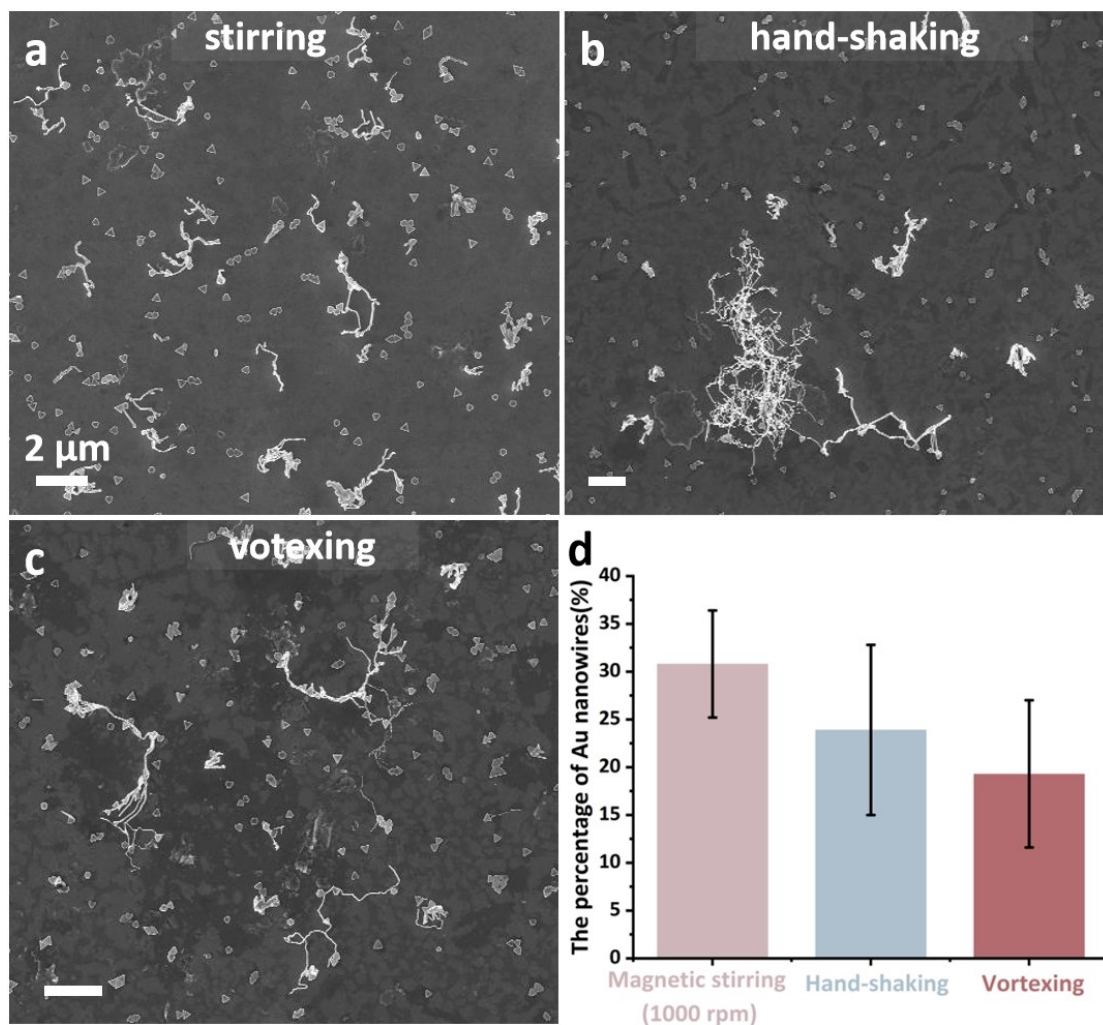

**Fig. S9** SEM images of the shear-induced Au nanowires with the shear-force applied via (a) magnetic stirring (1000 rpm), (b) hand-shaking, and (c) vortexing. (d) The histogram of the percentage of Au nanowires among all nanostructures in (a), (b) and (c).

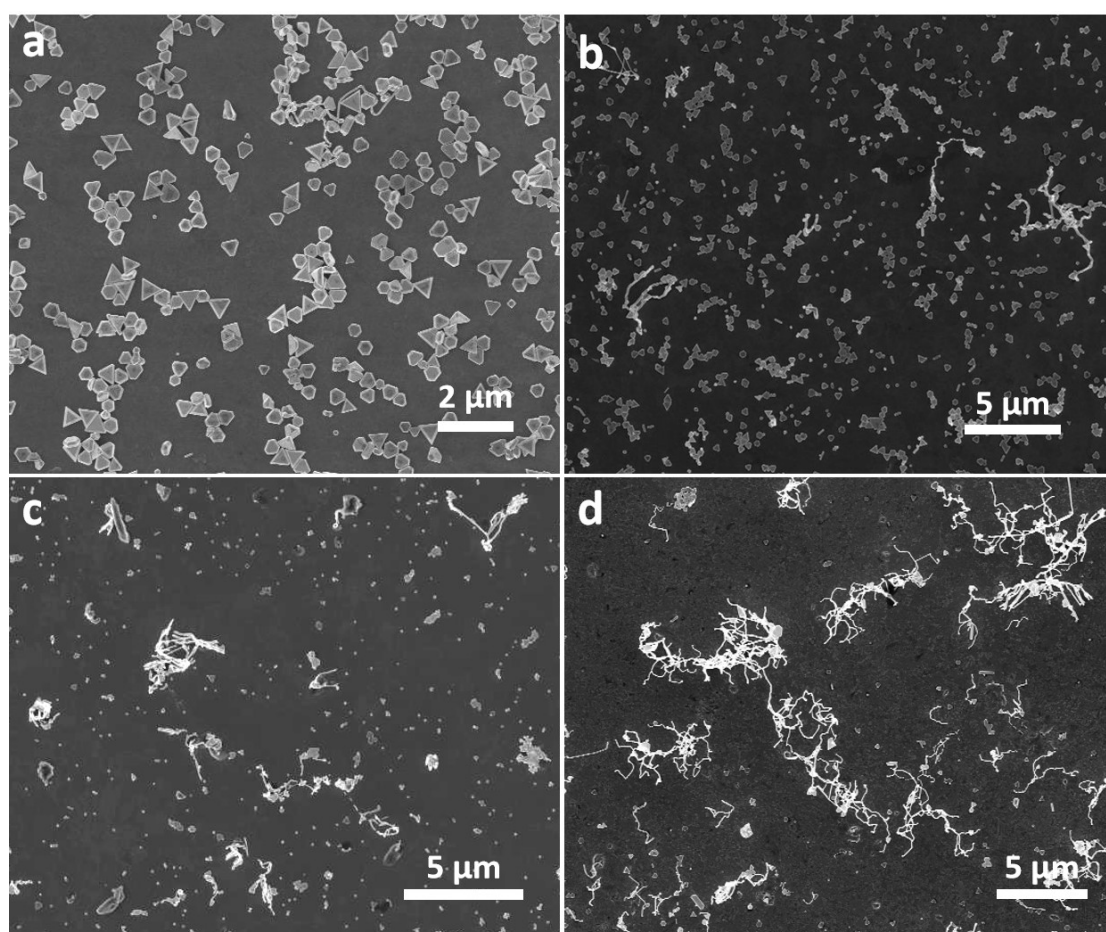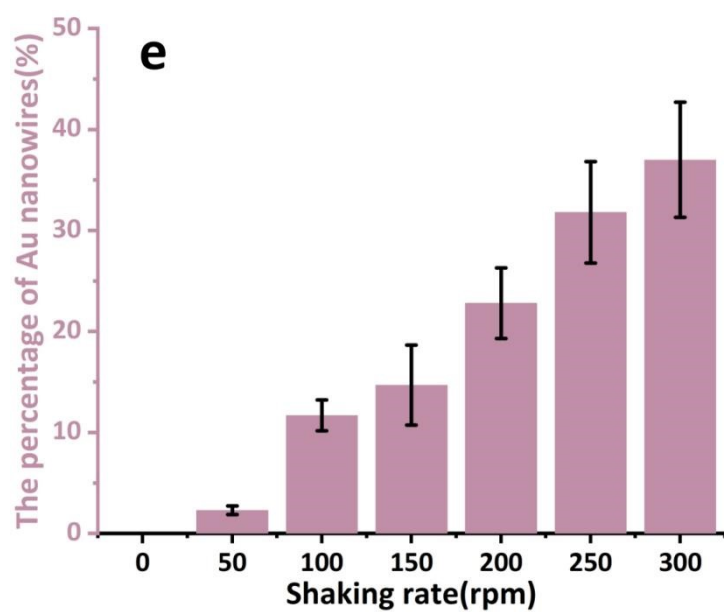

**Fig. S10** SEM images of the shear-induced Au nanowires obtained with (a) 50 rpm; (b) 100 rpm; (c) 200 rpm and (d) 300 rpm orbital shaking. (e) The histogram of the percentage of the nanowires obtained at different orbital shaking rates.



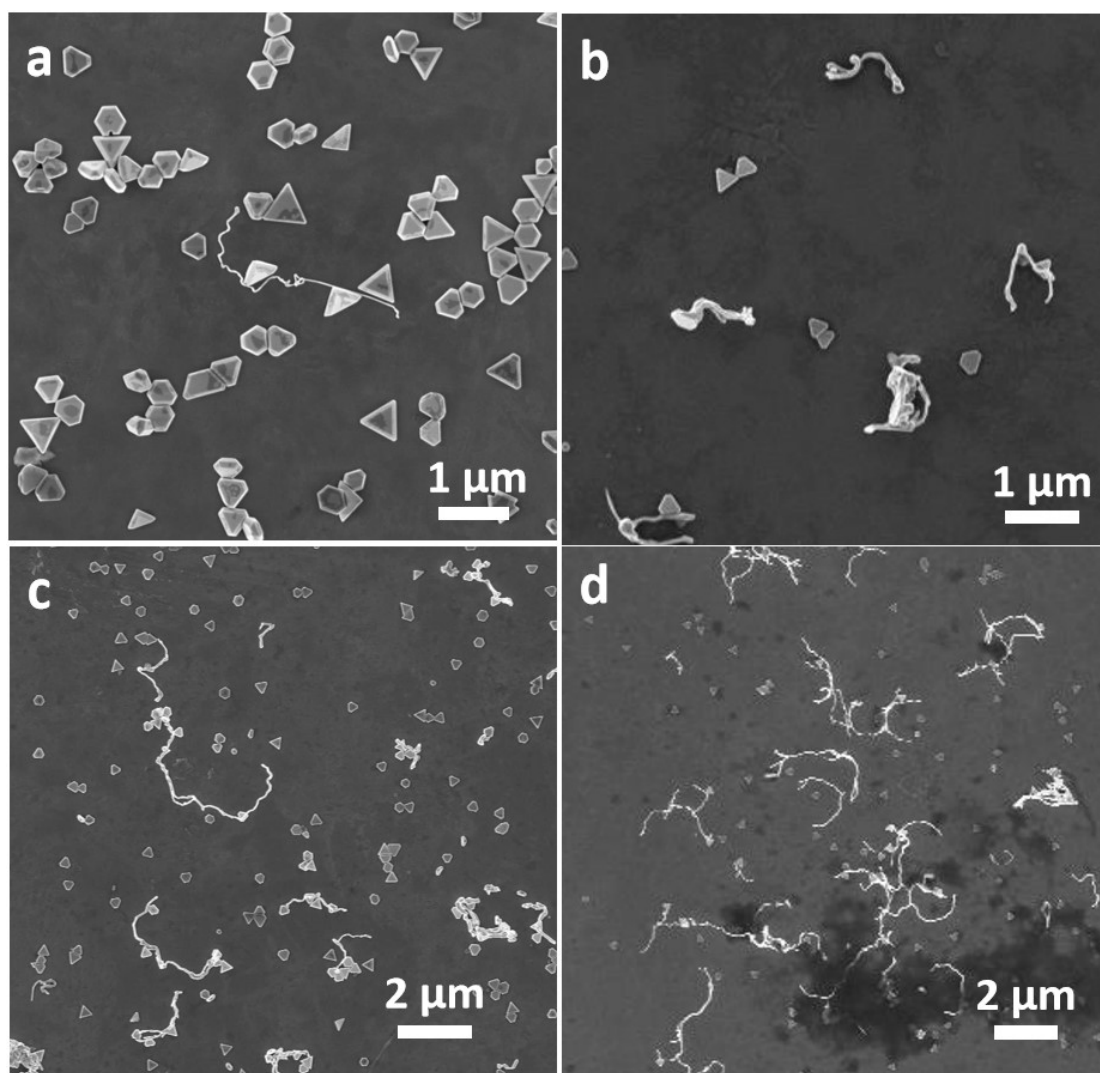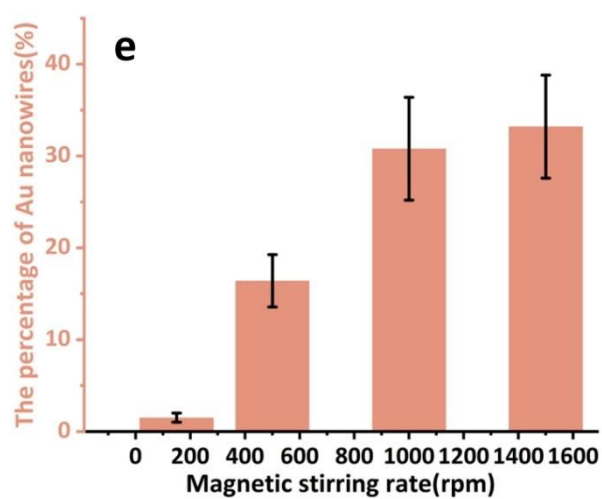

**Fig. S11** SEM images of the Au nanowires obtained with (a) 150 rpm; (b) 500 rpm; (c) 1000 rpm and (d) 1500 rpm magnetic stirring. (e) The histogram of the percentage of the nanowires at various magnetic stirring rate.

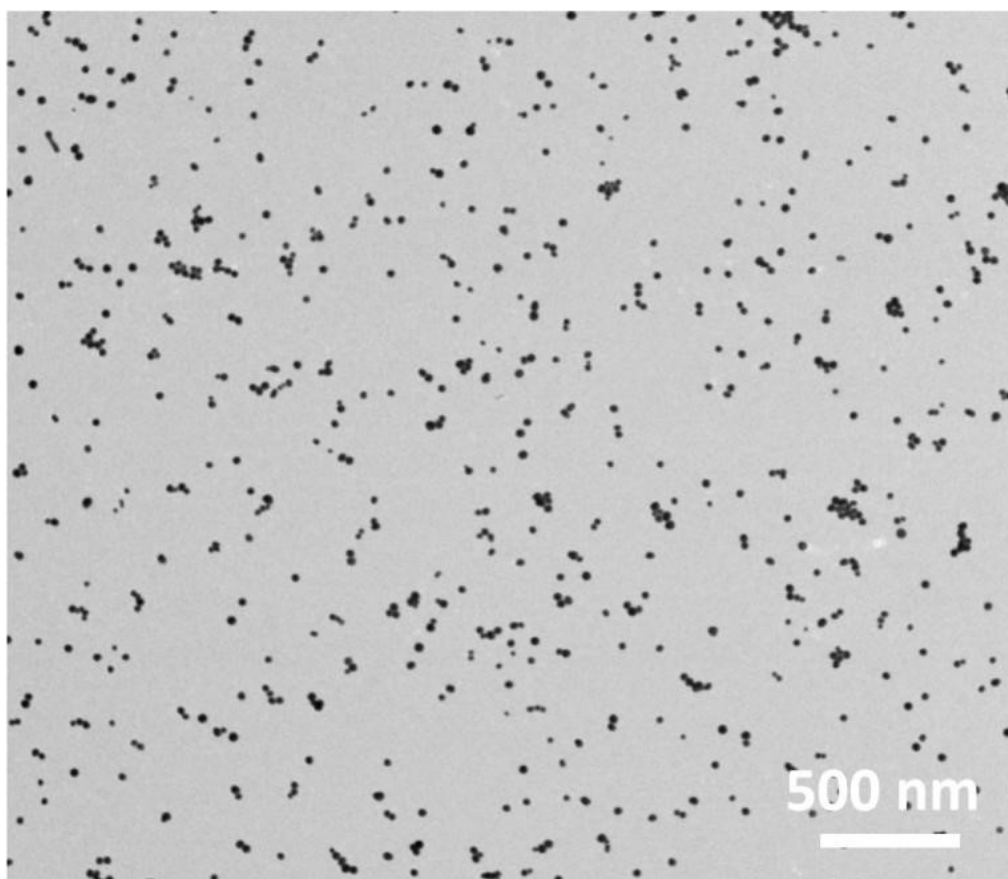

**Fig. S12** TEM image of the Au nanoparticles formed in the absence of CTAB, with all other conditions unchanged.

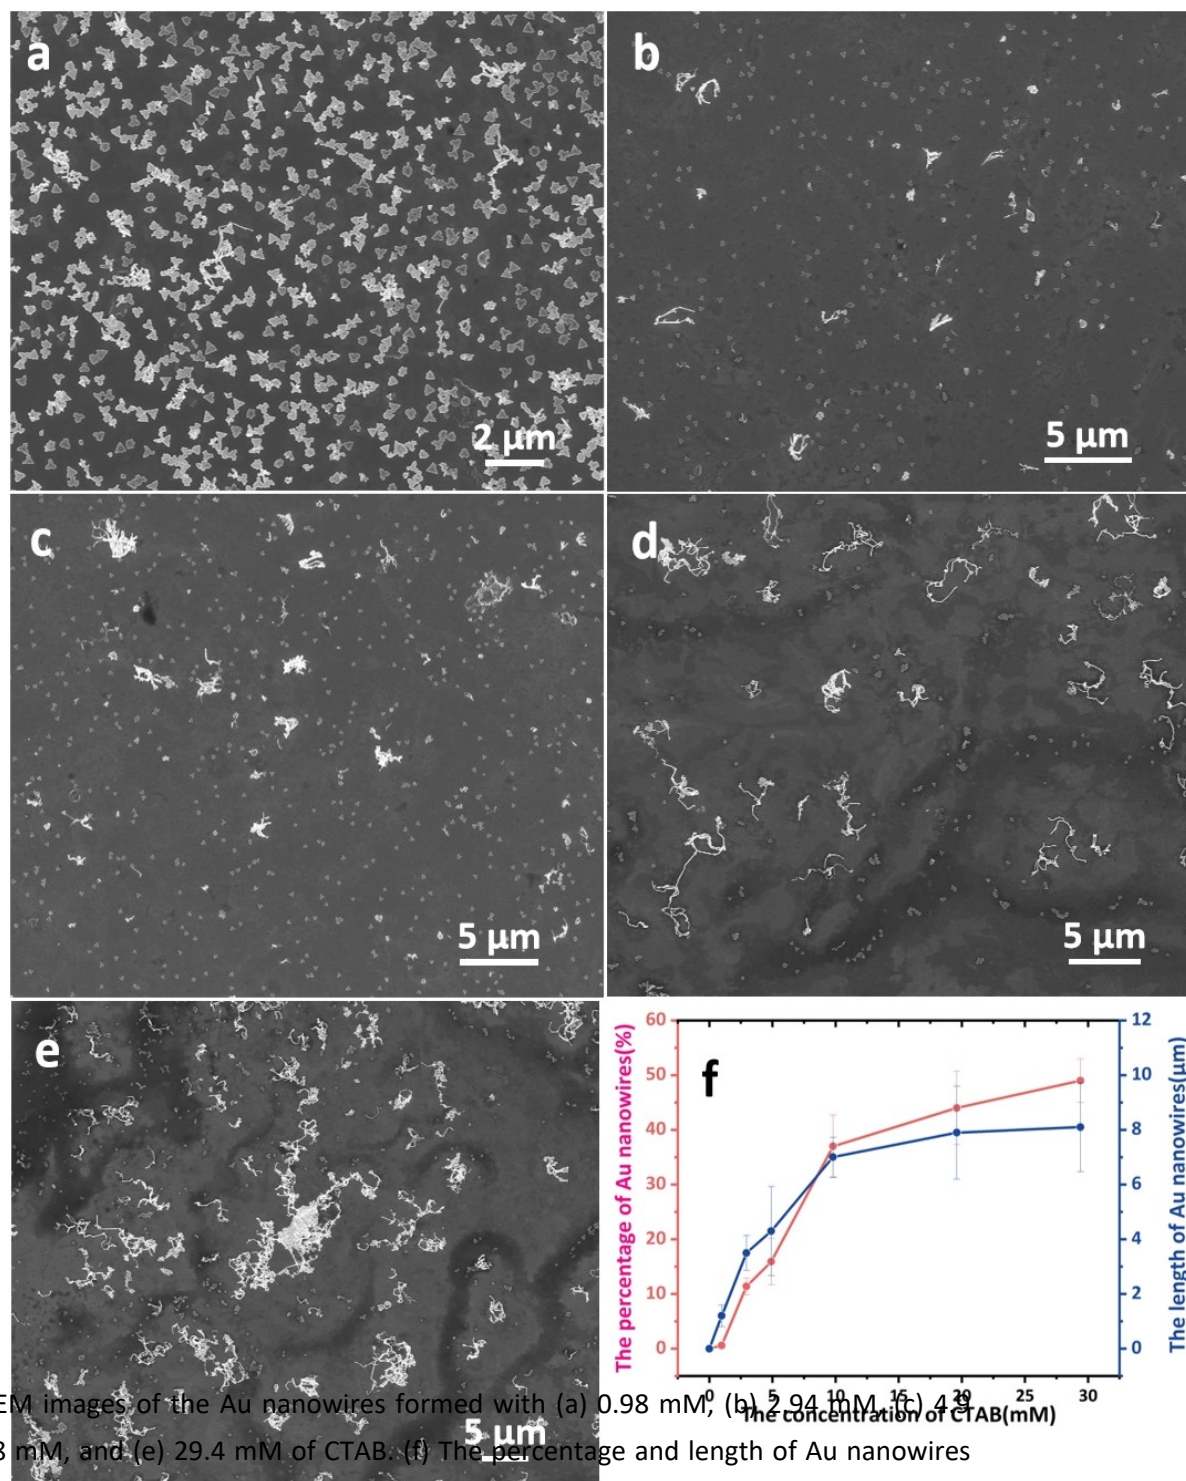

**Fig. S13** SEM images of the Au nanowires formed with (a) 0.98 mM, (b) 2.94 mM, (c) 4.9 mM, (d) 9.8 mM, and (e) 29.4 mM of CTAB. (f) The percentage and length of Au nanowires against the CTAB concentrations.



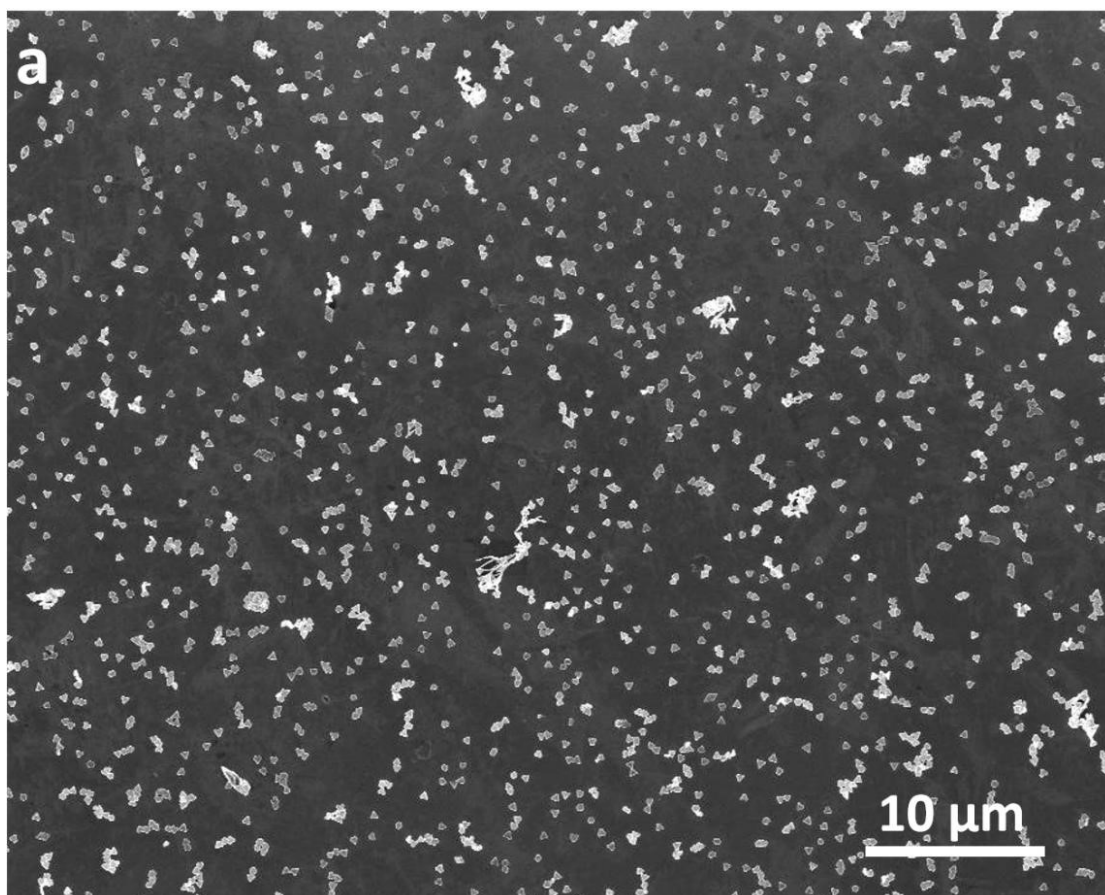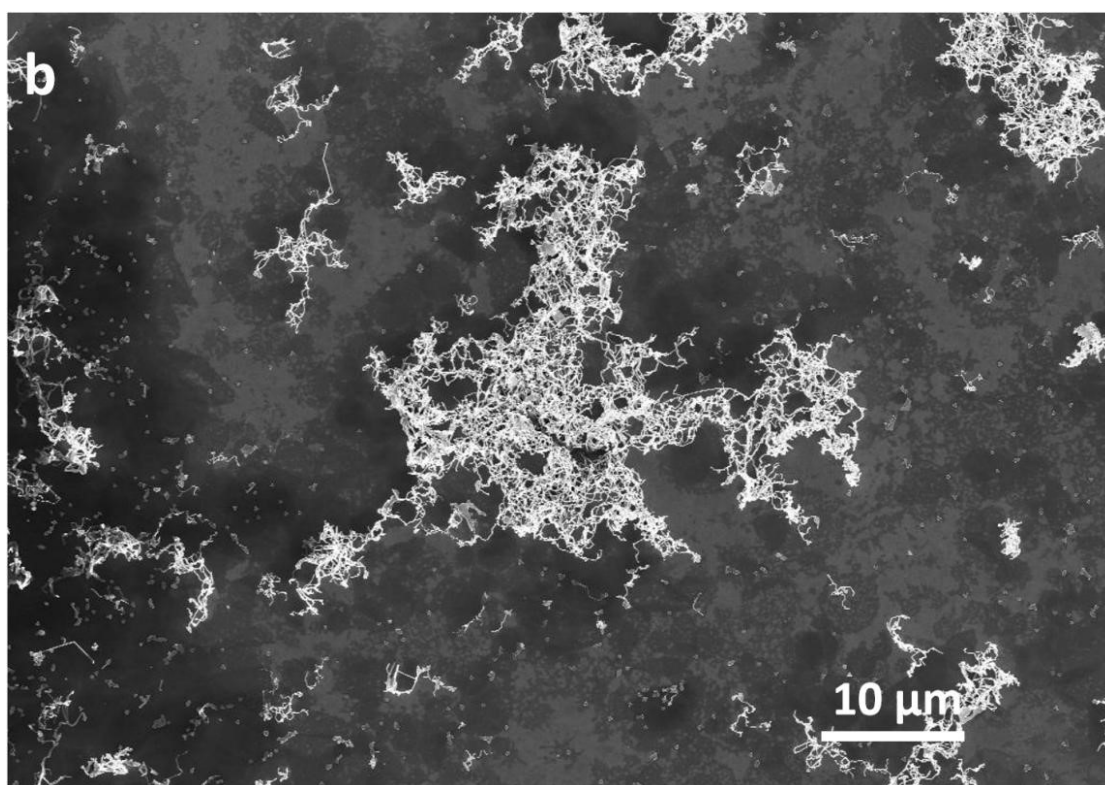

**Fig. S14** SEM images of the shear-induced Au nanowires obtained by replacing the  $\text{C}_{16}\text{TAB}$  with (a)  $\text{C}_{14}\text{TAB}$  and (b)  $\text{C}_{18}\text{TAB}$  as the ligand.

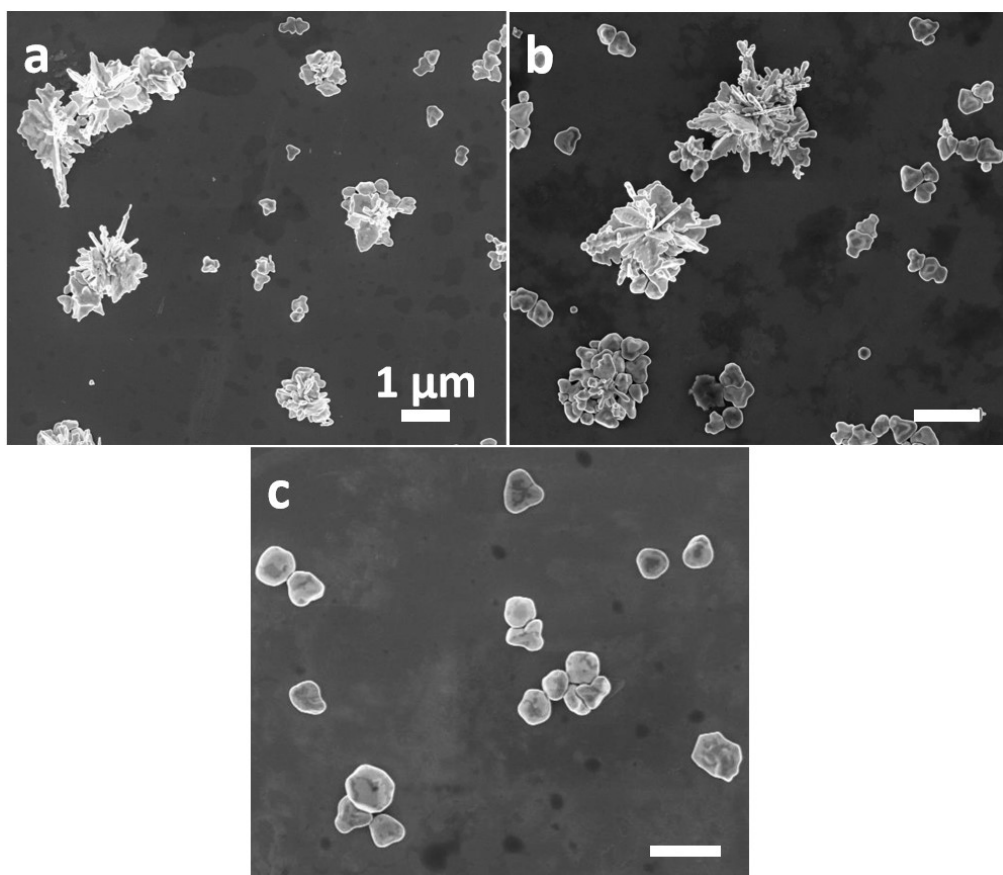

**Fig. S15** SEM images of the irregular Au nanostructures obtained by replacing the  $C_{16}$ TAB with (a)  $C_3$ TAB, (b)  $C_6$ TAB and (c)  $C_{12}$ TAB as the ligand.

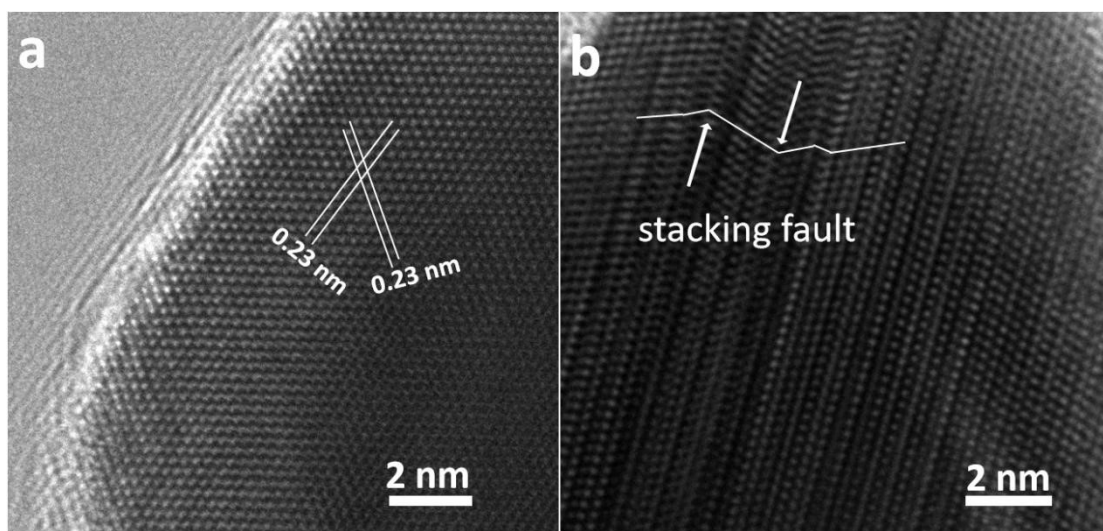

**Fig. S16** HRTEM images showing the lattice structure of (a) the ridge and (b) the tail segments of the nano-badges.

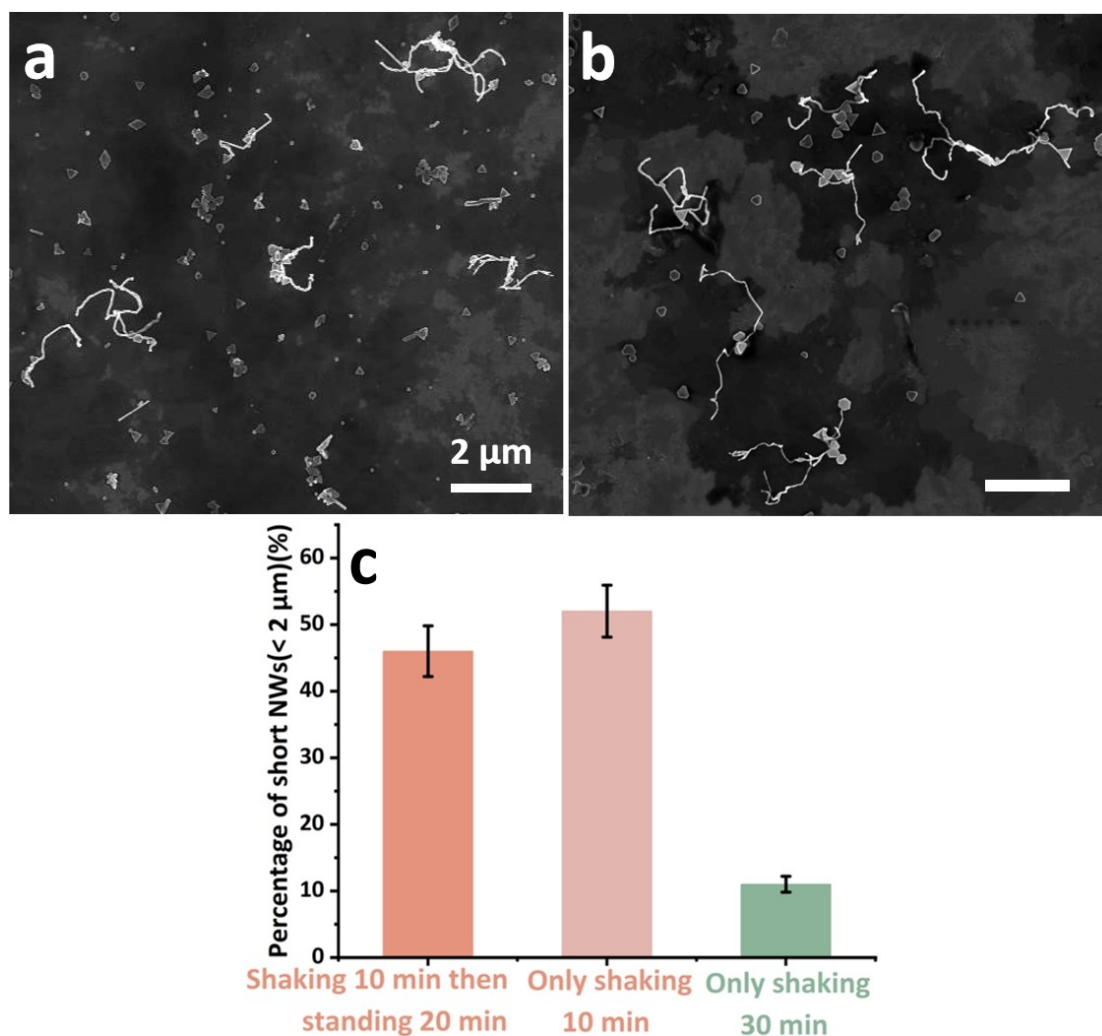

**Fig. S17** SEM images of the Au nanowires when the reaction mixture was (a) firstly shaken for 10 min and then subjected to un-disturbed incubation at 60 °C for 20 min; and (b) shaken for 10 min. (c) The histogram comparing the percentage of short Au nanowires (< 2 μm) in condition (a) and (b) with the typical case (30 min orbital shaking).

If the reaction mixture was firstly shaken for 10 min and then subjected to un-disturbed incubation at 60 °C for 20 min, the short nanowires (< 2 μm) percentage was 46%, almost the same as the reaction trapped after 10 min shaking (Fig. S17b) This indicates that shaking is essential for maintaining the linear elongation of the nanowires.

## Notes and references

- 1 Y. Huang, A. R. Ferhan, Y. Gao, A. Dandapat and D.-H. Kim, High-yield synthesis of triangular gold nanoplates with improved shape uniformity, tunable edge length and thickness, *Nanoscale*, 2014, **6**, 6496-6500.
- 2 A. Sánchez-Iglesias, N. Winckelmans, T. Altantzis, S. Bals, M. Grzelczak and L. M. Liz-Marzán, High-Yield Seeded Growth of Monodisperse Pentatwinned Gold Nanoparticles through Thermally Induced Seed Twinning, *J. Am. Chem. Soc.*, 2016, **139**, 107-110.
